# Supplementary material for: Neuron-specific chromatin disruption at CpG islands and aging-related regions in Kabuki syndrome mice
Source: HighWire-hosted journal article supplement (doi:10.1101/gr.278416.123), 2024-05-01
Supplement: Supplemental_Table15.xlsx [file Supplemental_Table15.xlsx]

## Sheet: SuppTable15_KS1_shared_3_cell_t
pathway	overrepresentation_pval
Mus musculus: Signal Transduction	1.37859e-05
Mus musculus: Signaling by Activin	0.000112021
Mus musculus: Signaling by TGFB family members	0.000493829
Mus musculus: Formyl peptide receptors bind formyl peptides and many other ligands	0.000587002
Mus musculus: Signaling by BMP	0.000864502
Mus musculus: Nitric oxide stimulates guanylate cyclase	0.00200869
Mus musculus: cGMP effects	0.00200869
Mus musculus: G alpha (i) signalling events	0.00363224
Mus musculus: FGFR3 ligand binding and activation	0.00400476
Mus musculus: FGFR3c ligand binding and activation	0.00400476
Mus musculus: Transport of small molecules	0.00406107
Mus musculus: Activation of G protein gated Potassium channels	0.00459872
Mus musculus: G protein gated Potassium channels	0.00459872
Mus musculus: Inhibition of voltage gated Ca2+ channels via Gbeta/gamma subunits	0.00459872
Mus musculus: Synthesis of Ketone Bodies	0.00566774
Mus musculus: G alpha (s) signalling events	0.00566908
Mus musculus: Neurotransmitter release cycle	0.00586389
Mus musculus: Platelet homeostasis	0.00591313
Mus musculus: SLC-mediated transmembrane transport	0.0060444
Mus musculus: Ketone body metabolism	0.00692736

## Sheet: README
The top 20 significant Reactome pathways based on promoter ATAC peaks disrupted in the KS1 vs wild-type differential accessibility analysis in all 3 cell types.
